# Supplementary material for: A Strategy to Optimize the Generation of Stable Chromobody Cell Lines for Visualization and Quantification of Endogenous Proteins in Living Cells
Source: PubMed Central journal article supplement (PMC6640688; doi:10.3390/antib8010010), 2019-01-10
Supplement: antibodies-08-00010-s001.pdf [file antibodies-08-00010-s001.pdf]

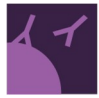

**Supplementary: A strategy to optimize the generation of stable chromobody cell lines for visualization and quantification of endogenous proteins in living cells**

*Bettina-Maria Keller<sup>1</sup>, Julia Maier<sup>1</sup>, Melissa Weldle<sup>1</sup>, Soeren Segan<sup>2</sup>, Bjoern Traenkle<sup>1</sup>, Ulrich Rothbauer<sup>1,2\*</sup>*

<sup>1</sup> Pharmaceutical Biotechnology, Eberhard Karls University Tuebingen, Germany

<sup>2</sup> Natural and Medical Sciences Institute at the University of Tuebingen, Reutlingen, Germany

Correspondence: Prof. Dr. Ulrich Rothbauer, Natural and Medical Sciences Institute at the University of Tuebingen

Markwiesenstr. 55, 72770 Reutlingen, Germany.

E-mail: [ulrich.rothbauer@uni-tuebingen.de](mailto:ulrich.rothbauer@uni-tuebingen.de)

Phone: +49 7121 51530-415

Fax: +49 7121 51530-816

## Supplementary information

| DNA oligo name                                          | Sequence, 5' - 3'                                                                                                                                                                                                                                                                                                                                                                                                                                                                                                                                                                                                                                                                                                                                                                                                                                                                                                                                                                                                                                                                                                                                                                                                                                                                                                                                                                                                                                                                      |
|---------------------------------------------------------|----------------------------------------------------------------------------------------------------------------------------------------------------------------------------------------------------------------------------------------------------------------------------------------------------------------------------------------------------------------------------------------------------------------------------------------------------------------------------------------------------------------------------------------------------------------------------------------------------------------------------------------------------------------------------------------------------------------------------------------------------------------------------------------------------------------------------------------------------------------------------------------------------------------------------------------------------------------------------------------------------------------------------------------------------------------------------------------------------------------------------------------------------------------------------------------------------------------------------------------------------------------------------------------------------------------------------------------------------------------------------------------------------------------------------------------------------------------------------------------|
| NB-ubi-for                                              | ATA TAT CTG CAG GAG TCT GGG GGA GGC TTG GTG CA                                                                                                                                                                                                                                                                                                                                                                                                                                                                                                                                                                                                                                                                                                                                                                                                                                                                                                                                                                                                                                                                                                                                                                                                                                                                                                                                                                                                                                         |
| NB-ubi-rev                                              | ATA TAT TCC GGA GGA GAC GGT GAC CTG GGT CCC                                                                                                                                                                                                                                                                                                                                                                                                                                                                                                                                                                                                                                                                                                                                                                                                                                                                                                                                                                                                                                                                                                                                                                                                                                                                                                                                                                                                                                            |
| $\beta$ -actin-promoter-for                             | GGA ATT AAT ACT GCC TGG CCA CTC CAT G                                                                                                                                                                                                                                                                                                                                                                                                                                                                                                                                                                                                                                                                                                                                                                                                                                                                                                                                                                                                                                                                                                                                                                                                                                                                                                                                                                                                                                                  |
| $\beta$ -actin-promoter-rev                             | TCC GCT AGC TCG GCA AAG GCG AGG C                                                                                                                                                                                                                                                                                                                                                                                                                                                                                                                                                                                                                                                                                                                                                                                                                                                                                                                                                                                                                                                                                                                                                                                                                                                                                                                                                                                                                                                      |
| $\beta$ -actin-promoter-mutPstI-for                     | AGA GCT CCT TGT GCA GGA GCG                                                                                                                                                                                                                                                                                                                                                                                                                                                                                                                                                                                                                                                                                                                                                                                                                                                                                                                                                                                                                                                                                                                                                                                                                                                                                                                                                                                                                                                            |
| $\beta$ -actin-promoter-mutPstI-rev                     | TGG AGG GCA TGG AGT GGC                                                                                                                                                                                                                                                                                                                                                                                                                                                                                                                                                                                                                                                                                                                                                                                                                                                                                                                                                                                                                                                                                                                                                                                                                                                                                                                                                                                                                                                                |
| AAVS1-CB-donor-fragment-2-for                           | TAG AGG CGG CAA TTG TTC A                                                                                                                                                                                                                                                                                                                                                                                                                                                                                                                                                                                                                                                                                                                                                                                                                                                                                                                                                                                                                                                                                                                                                                                                                                                                                                                                                                                                                                                              |
| AAVS1-CB-donor-fragment-2-rev                           | TGT TGT TAA CTT GTT TAT TGC AGC                                                                                                                                                                                                                                                                                                                                                                                                                                                                                                                                                                                                                                                                                                                                                                                                                                                                                                                                                                                                                                                                                                                                                                                                                                                                                                                                                                                                                                                        |
| Seq-AAVS1-CB-donor-1                                    | TAT GGA AAA ACG CCA GCA AC                                                                                                                                                                                                                                                                                                                                                                                                                                                                                                                                                                                                                                                                                                                                                                                                                                                                                                                                                                                                                                                                                                                                                                                                                                                                                                                                                                                                                                                             |
| Seq-AAVS1-CB-donor-2                                    | ATG TGG CTC TGG TTC TGG G                                                                                                                                                                                                                                                                                                                                                                                                                                                                                                                                                                                                                                                                                                                                                                                                                                                                                                                                                                                                                                                                                                                                                                                                                                                                                                                                                                                                                                                              |
| Seq-AAVS1-CB-donor-3                                    | AGC GGC TCG GCT TCA C                                                                                                                                                                                                                                                                                                                                                                                                                                                                                                                                                                                                                                                                                                                                                                                                                                                                                                                                                                                                                                                                                                                                                                                                                                                                                                                                                                                                                                                                  |
| Seq-AAVS1-CB-donor-4                                    | CCT TAG ATG TTT TAC TAG CCA GAT                                                                                                                                                                                                                                                                                                                                                                                                                                                                                                                                                                                                                                                                                                                                                                                                                                                                                                                                                                                                                                                                                                                                                                                                                                                                                                                                                                                                                                                        |
| genPCR-AAVS1-int-for                                    | TCG ACT TCC CTT CTT CCG ATG                                                                                                                                                                                                                                                                                                                                                                                                                                                                                                                                                                                                                                                                                                                                                                                                                                                                                                                                                                                                                                                                                                                                                                                                                                                                                                                                                                                                                                                            |
| genPCR-AAVS1-int-rev                                    | CTC AGA TTC TGG GAG AGG GTA                                                                                                                                                                                                                                                                                                                                                                                                                                                                                                                                                                                                                                                                                                                                                                                                                                                                                                                                                                                                                                                                                                                                                                                                                                                                                                                                                                                                                                                            |
| EF1 $\alpha$ -promoter (gBlock® gene fragment)          | TTACCGCCATGCATTAGTTATTAATGGCTCCGGTGCCCGTCAGTGGGCAGAGCGCACATCGCCACAGTCCCCGAGAAGTTGGGGGGAGGGGTCGGCATTGAACCGGTGCCTAGAGAAGGTGGCGCGGGGTAAACTGGGAAAAGTGATGTCTGTACTGGCTCCGCCTTTTTCCCGAGGGTGGGGGAGAACCGTATATAAGTGCAGTAGTCGCCGTGAACGTTCTTTTTTCGCAACGGGTTGCCGCCAGAACACAGGTAAGTGCCGTGTGTGGTTCCCGCGGGCCTGGCCTCTTACGGGTTATGGCCCTTGCCTGCTGAATTACTTCCACCTGGCTCCAGTACGTGATTTGATCCCCGAGCTTCGGGTTGGAAGTGGGTGGGAGAGTTCGAGGCCCTTGCCTTAAGGAGCCCCCTCGCCTCGTGCTTGAGTTGAGGCCTGGCCTGGGCGCTGGGGCCCGCGGTGCGAATCTGGTGGCACCTTCGCGCCTGTCTCGCTGCTTTCGATAAGTCTCTAGCCATTTAAATTTTTGATGACCTGCTGCGACGCTTTTTTCTGGCAAGATAGTCTTGTAATGCGGGCCAAGATCTGCACACTGGTATTCGGTTTTTGGGGCCGCGGGCGGCGACGGGGCCCGTGTGCCAGCGCACTTGTTCGGCGAGGCGGGGCTGCGAGCGCGGCCACCGAGAATCGGACGGGGTAGTCTCAAGCTGGCCGGCCTGCTCTGGTGCCTGGTCTCGCGCCCGCGTGTATCGCCCCGCCCTGGGCGGCAAGGCTGGCCCCGGTCGGCACCAAGTTGCGTGAGCGGAAAGATGGCCGCTTCCCGCCCTGCTCCAGGGAGCTCAAAATGGAGGACCGCGCGCTCGGAGAGCGGGCGGTGAGTCAACCACACAAGGAAAGGGCCTTTCCTCCTCAGCCGTCGCTTCATGTGACTCCACGGAGTACCGGGCGCCGTCCAGGCACCTCGATTAGTTCTCGAGCTTTGGAGTACGTCGCTTTAGGTTGGGGGGAGGGGTTTTATGCGATGGAGTTCCCCACACTGAGTGGGTGGAGACTGAAGTTAGGCCAGCTTGGCACTTGATGTAATTCTCCTGGAAATTTGCCCTTTTGGATTTGGATCTTGGTTCATTCTCAAGCCTCAGACAGTGGTTCAAAGTTTTTTCTTCCATTCAGGTGTCGTGAGCTAGCGCCACCATGCAGATCTTCG                                                                                                                                                                                                                                   |
| AAVS1-CB-donor fragment 1 (gene synthesis, plasmid DNA) | CCTTTTGCTGGCCTTTTGCTCACATGTTGCTTCTCTGACCAGCATTCTCTCCCCTGGGCCGTGCGCCGCTTCTGTCTCCAGCTTGTGGCCTGGGTACCTCTACGGCTGGCCCAGATCCTTCCCTGCCGCCTCCTCAGGTTCCGTCTTCTCCACTCCCTCTTCCCCTTGTCTCTGTGTGTTGCTGCCAAAGGATGCTCTTTCCGCAGCACTTCTTCTCGGCGTGCACCAAGTGTGTCCTCTGAGCGCATCCTCCCCGTGCTGGGTCTCTCCGGGATCTCTCCTCCTCCTCCCTCACC CAACCCCATGCCGCTTCACTCGTGGGTTCCCTTTTCTCTCTCTTGGGGCCTGTGCCATCTCTCGTTTCTTAGGATGGCCTTCTCCGACGGATGCTCTCCCTTGGCTCCCGCCTCCCTTCTTGTAGGCCTGCATCATCACCGTTTTTCTGGACAACCCCAAAGTACCCCGTCTCCCTGCTTTAGCCACCTCTCCATCCTCTTGCTTTCTTGGCTGGACACCCCGTCTCCTGTGGATTCGGGTACCTCTACTCCTTTCAATTTGGGCAGCTCCCCTACCCCTTACCTCTCTAGTCTGTGCAAGCTTCCAGCCCCCTGTATGGCATCTTCCAGGGTCCGAGAGCTCAGCTAGTCTTCTTCCCAACCCGGGCCCTATGTCCACTTCAGGACAGCATGTTTGTGCTCCAGGCATCCTGTGCCGAGCTGGGACCACCTTATATTTCCAGGGCCGGTAAATGTGGCTCTGGTTCTGGTACTTTTATCTGTCCCCTCCACCCACAGTGGGCAAGCTTCTGACCTCTTCTTCTCCACAGGCCTCGAGAGATCTGGCAGCGGAGAGGAGAGGAAGTCTTCTAACATGCGGTGACGTGGAGGAGAATCCCGCCCTAGGCTCGAGATGACAGAATACAAACCCACGGTGGGCTCGGACTCGCGATGACGTGCCCGAGCGGTGAGAACATTGGCAGCAGCGTTCGCAGACTATCCGGCTACGCGGCATACTGTGATCCTGATCGACATATGAAACGGGTACCGAGTTGCAGGAGCTTTTCTCACACGCGTTGGATTGGATATTGGCAAGTATGGGTCCGGACGACGGGGCAGCTGTGCGCGTGTGGACCACCCCGAGTCAAGTGGAGCTGGAGCGGTATTCGCTGAGATCGGCCCTCGGATGGCAGAATTGAGCGGCTCCAGACTGGCGGCTCAACAGCAGATGGAAGGGTCTCTCGCCCTCATAGACCTAAGGAACCTGCTTGGTTCTCGCAACCGTGGGCGTCTCACCAGACCATCAGGGGAAGGGCCTTGGTCTGCGGTGGTCTTCCCGGGGTCGAGGCaGCAGAGAGAGCTGGGTACCCGCGTTTTTGAAACAAGTGGCCCCGAAACCTCCCGTTTTACGAACGGCTTGGCTTACAGTCACA |

|                                                    |   |                                                                                                                                                                                                                                                                                                                                                                                                                                                                                                                                                                                                                                                                                                                                                                                                                                                                                                                                                                                                                                                                                                                                                                                                                                                                                                                                                                                                                                                                                                                    |
|----------------------------------------------------|---|--------------------------------------------------------------------------------------------------------------------------------------------------------------------------------------------------------------------------------------------------------------------------------------------------------------------------------------------------------------------------------------------------------------------------------------------------------------------------------------------------------------------------------------------------------------------------------------------------------------------------------------------------------------------------------------------------------------------------------------------------------------------------------------------------------------------------------------------------------------------------------------------------------------------------------------------------------------------------------------------------------------------------------------------------------------------------------------------------------------------------------------------------------------------------------------------------------------------------------------------------------------------------------------------------------------------------------------------------------------------------------------------------------------------------------------------------------------------------------------------------------------------|
|                                                    |   | GCAGATGTTGAAGTACCGGAGGGACCAAGGACCTGGTGCATGACCCGCAAGCCGGGA<br>GCTTGATCAAGAGGGCCCGTTTAAACCCGCTGATCAGCCTCGACTGTCCTTCTAGTTG<br>CCAGCCATCTGTTGTTTGGCCCTCCCCGTCCTTCCCTGACCCTGGAAGGTGCCACTCC<br>CACTGTCCTTTCCTAATAAAAATGAGGAAATTGCATCGCATTGTCTGAGTAGGTGTCATT<br>CTATTCTGGGGGTGGGGTGGGGCAGGACAGCAAGGGGGAGGATTGGGAAGACAATA<br>GCAGGCATGCTGGGGATGCGGTGGGCTCTATGGACTAGTATTAATTAATCTAGAGGC<br>GGCAATTGTTCACTCCTCAGGTGCAGGC                                                                                                                                                                                                                                                                                                                                                                                                                                                                                                                                                                                                                                                                                                                                                                                                                                                                                                                                                                                                                                                                                                     |
| AAVS1-CB-donor fragment<br>(gBlock® gene fragment) | 2 | AAATCTAGAGGCGGCAATTGTTCACTCCTCAGGTGCAGGCTGCCTATCAGAAGGTGGT<br>GGCTGGTGTGGCCAATGCCCTGGCTCACAAATACCACTGAGATCTTTTTCCCTCTGCCA<br>AAAATTATGGGGACATCATGAAGCCCCTTGAGCATCTGACTTCTGGCTAATAAAGGAA<br>ATTTATTTTCATTGCAATAGTGTGTTGGAATTTTTGTGTCTCTACTCGGAAGGACATAT<br>GGGAGGGCAAATCATTAAAACATCAGAATGAGTATTGGTTTAGAGTTTGGCAACAT<br>ATGCCATATGCTGGCTGCCATGAACAAAGGTGGCTATAAAGAGGTCATCAGTATATGA<br>AACAGCCCCCTGCTGTCCATTCTTATCCATAGAAAAGCCTTGACTTGAGGTTAGATTT<br>TTTTATATTTGTTTGTGTTATTTTTTCTTAAACATCCCTAAAATTTTCCCTTAGATGTT<br>TACTAGCCAGATTTTCTCCTCTCCTGACTACTCCAGTCATAGCTGTCCCTTCTCCTG<br>CGACAGTACTAAGCTTTGACAGAAAAGCCCCATCCTTAGGCCTCCTCCTTCTAGTCTC<br>CTGATATTGGGTCTAACCCCCACCTCCTGTTAGGCAGATTCTTATCTGGTGACACACCC<br>CCATTTCTGGAGCCATCTCTCCTTGCCAGAACCTCTAAGGTTTGCTTACGATGGAGC<br>CAGAGAGCATCCTGGGAGGGAGAGCTTGGCAGGGGGTGGGAGGGAAGGGGGGGATG<br>CGTGACCTGCCCGTTCAGTGGCCACCCTGCGCTACCCTCTCCAGAACCTGAGCTG<br>CTCTGACGCGGCTGTCTGGTGCCTTACTGATCCTGGTGCTCCAGCTTCTTACACTTC<br>CCAAGAGGAGAAGCAGTTTGGAAAAACAAAATCAGAATAAGTTGGTCTGAGTTCTA<br>ACTTTGGCTCTTACCTTCTAGTCCCCAATTTATATTGTTCTCCGTGCGTCAGTTTTAC<br>CTGTGAGATAAGGCCAGTAGCCAGCCCCGTCCTGGCAGGGCTGTGGTGAGGAGGGGG<br>GTGTCCGTGTGAAAACCTCCTTTGTGAGAATGGTGCCTCCTAGGTGTTACACAGGTG<br>TGGCCGCTCTACTCCCTTCTCTTCTCCATCCTTCTTCTTAAAGAGTCCCCAGTGCT<br>ATCTGGACATAATCCTCCGCCAGAGCAGGGTCCCGCTTCCCTAAGGCCCTGCTCTGG<br>GCTTCTGGGTTTGTGCTTGGCAAGCCCAGGAGAGGCGCTCAGGCTTCCCTGTCCCC<br>TTCTCGTCCACCATCTCATGCCCTGGCTCTCCTGCCCTTCCCTACAGGGGTTCTGG<br>CTCTGCTCTCAATTGTTGTTGTTAACTTGTATTATGCAGCTTATAATGG |

Table S1: List of DNA oligonucleotides and synthesized gene fragments used in this study

|     | Expression construct                       |
|-----|--------------------------------------------|
| 1.  | pEGFP-N1 (Clontech)                        |
| 2.  | Ub-M-BC1-CB [1]                            |
| 3.  | Ub-R-BC1-CB [1]                            |
| 4.  | LMN-CB [2]                                 |
| 5.  | Ub-M-LMN-CB (this study)                   |
| 6.  | Ub-R-LMN-CB (this study)                   |
| 7.  | (EF1 $\alpha$ )-Ub-R-BC1-CB (this study)   |
| 8.  | ( $\beta$ -actin)-Ub-R-BC1-CB (this study) |
| 9.  | mCherry [3]                                |
| 10. | mCherry-CTNNB1 [1]                         |
| 11. | Cas9_gRNA [4]                              |
| 12. | AAVS1_Ub-R-BC1-CB (this study)             |
| 13. | Actin-CB [5]                               |
| 14. | AAVS1_Ub-R-ACT-CB (this study)             |

Table S2: List of mammalian expression constructs used in this study

## Supplementary Figures

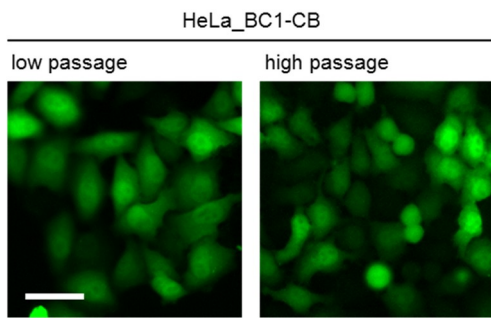

**Figure S1 Stable HeLa\_BC1-CB cell line displays heterogeneity in CB expression at high cell passages.**

Illustration of HeLa cells stably expressing the BC1-CB driven by the CMV promoter at an early passage (passage number 4, left side) and at a high passage (passage number 20, right side). Scale bar: 50  $\mu$ m.

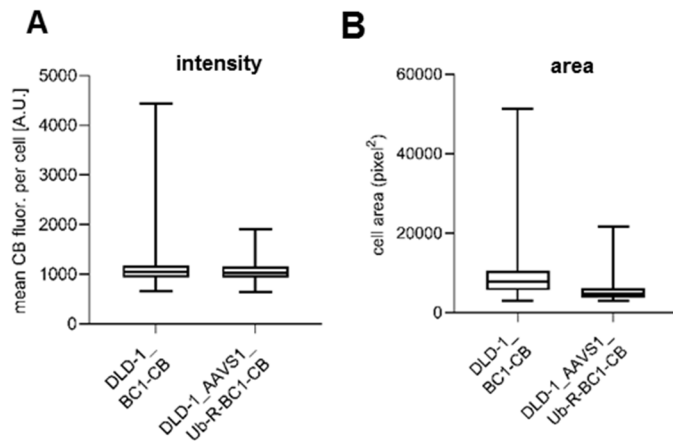

**Figure S2 Population-wide analysis of BC1-CB signal in DLD-1\_BC1-CB cells and DLD-1\_AAVS1\_Ub-R-BC1-CB.**

Fluorescence images of DLD-1\_BC1-CB cells and DLD-1\_AAVS1\_Ub-R-BC1-CB (as illustrated in **Figure 6C**) were subjected to quantitative image analysis. Using a customized image segmentation algorithm (see Material and Methods), the mean fluorescence intensity of the CB (**A**) and the cell area (**B**) were determined for each individual cell imaged. Number of analyzed cells: DLD-1\_BC1: n=2478; DLD1\_AAVS1\_Ub-R-BC1-CB: n=2090.

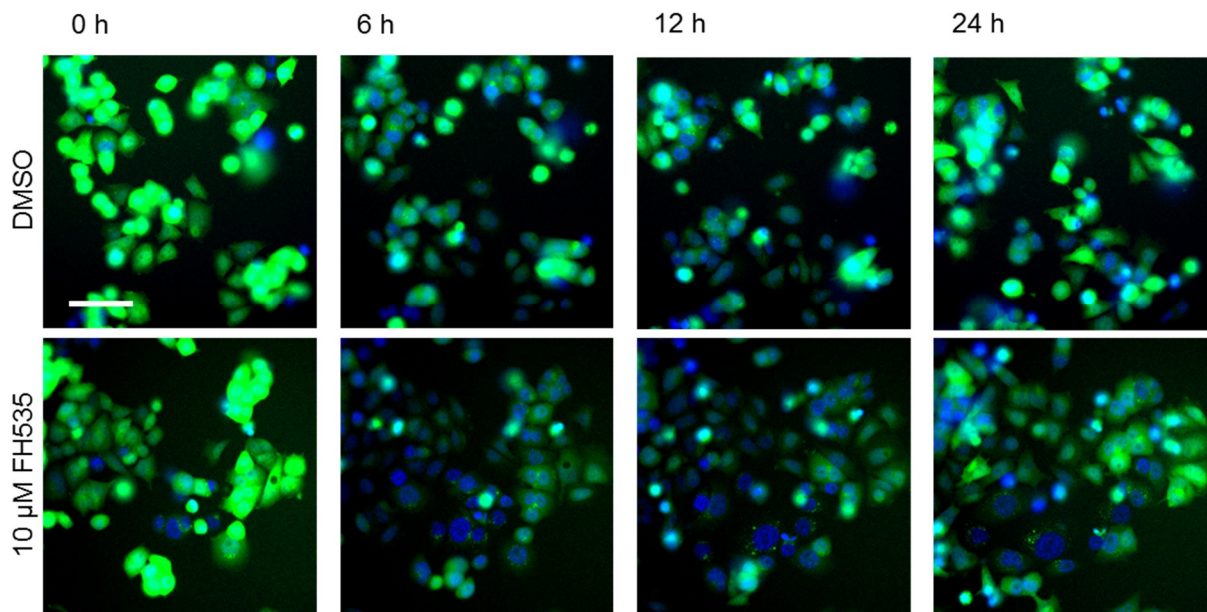

**Figure S3 Fluorescence images of DLD-1\_AAVS1\_Ub-R-BC1-CB cells upon compound treatment.**

DLD-1\_AAVS1\_Ub-R-BC1-CB were either treated with 10 μM FH535 or 0.01 % DMSO as control and were continuously imaged every 2 h for up to 24 h. Representative fluorescence images are shown after 0, 6, 12 and 24 h, scale bar: 50 μM.

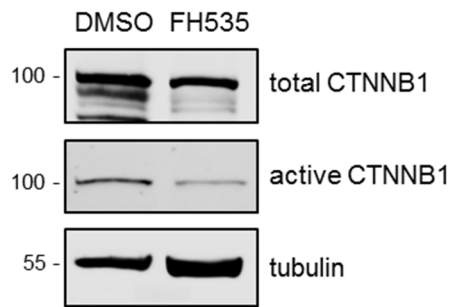

**Figure S4: FH535 reduces the amount of active CTNNB1 in DLD-1\_AAVS1\_Ub-R-BC1-CB cells.**

DLD-1\_AAVS1\_Ub-R-BC1-CB were either treated with 10  $\mu$ M FH535 or 0.01 % DMSO as control for 24 h. Cells were lysed using lysis buffer comprising 0.5% NP-40 and equal protein amounts of the soluble fraction were subjected to SDS-PAGE followed by immunoblot analysis using antibodies specific for total CTNNB1, active CTNNB1 and tubulin as loading control.



## References

1. Keller, B.M.; Maier, J.; Secker, K.A.; Egetemaier, S.M.; Parfyonova, Y.; Rothbauer, U.; Traenkle, B. Chromobodies to quantify changes of endogenous protein concentration in living cells. *Molecular & cellular proteomics : MCP* **2018**.
2. Zolghadr, K.; Gregor, J.; Leonhardt, H.; Rothbauer, U. Case study on live cell apoptosis-assay using lamin-chromobody cell-lines for high-content analysis. *Methods in molecular biology* **2012**, *911*, 569-575.
3. Toulany, M.; Maier, J.; Iida, M.; Rebholz, S.; Holler, M.; Grottke, A.; Jucker, M.; Wheeler, D.L.; Rothbauer, U.; Rodemann, H.P. Akt1 and akt3 but not akt2 through interaction with DNA-pkcs stimulate proliferation and post-irradiation cell survival of k-ras-mutated cancer cells. *Cell death discovery* **2017**, *3*, 17072.
4. Ocegüera-Yanez, F.; Kim, S.I.; Matsumoto, T.; Tan, G.W.; Xiang, L.; Hatani, T.; Kondo, T.; Ikeya, M.; Yoshida, Y.; Inoue, H., *et al.* Engineering the aavs1 locus for consistent and scalable transgene expression in human ipscs and their differentiated derivatives. *Methods* **2016**, *101*, 43-55.
5. Panza, P.; Maier, J.; Schmees, C.; Rothbauer, U.; Sollner, C. Live imaging of endogenous protein dynamics in zebrafish using chromobodies. *Development* **2015**, *142*, 1879-1884.

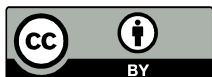

© 2019 by the authors. Submitted for possible open access publication under the terms and conditions of the Creative Commons Attribution (CC BY) license (<http://creativecommons.org/licenses/by/4.0/>).
